# Supplementary material for: A reversible switch for hydrogen adsorption and desorption: electric fields
Source: Royal Society of Chemistry journal article supplement (doi:10.1039/b907591g), 2009-01-01
Supplement: b907591g.pdf [file b907591g.pdf]

## Supplementary Information

Atomic coordinates and absolute energies of all optimized structures in "A Reversible Switch for Hydrogen Adsorption and Desorption: Electric Fields"

### 1. H<sub>2</sub>/Li<sub>8</sub>/SWCN Bridge site $F = 0.000$ au

Coordinates (Angstroms)

| ----- |   | -----     |           |          |
|-------|---|-----------|-----------|----------|
| ATOM  |   | X         | Y         | Z        |
| 1     | C | 13.162349 | 9.882012  | 1.404023 |
| 2     | C | 13.162028 | 9.883810  | 5.664084 |
| 3     | C | 13.162106 | 9.883874  | 2.811171 |
| 4     | C | 13.162306 | 9.882108  | 7.071241 |
| 5     | C | 12.903194 | 11.108132 | 3.534744 |
| 6     | C | 12.902255 | 11.105985 | 7.794903 |
| 7     | C | 12.902200 | 11.105875 | 0.680406 |
| 8     | C | 12.903118 | 11.108034 | 4.940517 |
| 9     | C | 12.218244 | 12.135351 | 1.410489 |
| 10    | C | 12.223170 | 12.140949 | 5.670276 |
| 11    | C | 12.223686 | 12.141352 | 2.805082 |
| 12    | C | 12.218485 | 12.135690 | 7.064921 |
| 13    | C | 11.168700 | 12.786981 | 3.533371 |
| 14    | C | 11.166774 | 12.783930 | 7.794329 |
| 15    | C | 11.166812 | 12.784050 | 0.680989 |
| 16    | C | 11.168464 | 12.786512 | 4.941991 |
| 17    | C | 9.940624  | 13.021551 | 1.404408 |
| 18    | C | 9.942071  | 13.025377 | 5.663120 |
| 19    | C | 9.941978  | 13.024913 | 2.812175 |
| 20    | C | 9.940660  | 13.021665 | 7.070980 |
| 21    | C | 8.716158  | 12.769089 | 3.535403 |
| 22    | C | 8.714442  | 12.772225 | 7.794535 |
| 23    | C | 8.714527  | 12.772094 | 0.680796 |
| 24    | C | 8.716203  | 12.769213 | 4.939925 |
| 25    | C | 7.680110  | 12.095694 | 1.410449 |
| 26    | C | 7.687203  | 12.088602 | 5.670026 |
| 27    | C | 7.686710  | 12.088931 | 2.805423 |
| 28    | C | 7.679551  | 12.096320 | 7.065039 |
| 29    | C | 7.028069  | 11.042185 | 3.534969 |
| 30    | C | 7.026648  | 11.046280 | 7.794572 |
| 31    | C | 7.026680  | 11.046139 | 0.680755 |
| 32    | C | 7.028202  | 11.042123 | 4.940423 |
| 33    | C | 6.798851  | 9.814841  | 1.404397 |
| 34    | C | 6.798730  | 9.812486  | 5.664563 |

Supplementary Material (ESI) for *PCCP*  
 This journal is © the Owner Societies 2009

|    |    |           |           |          |
|----|----|-----------|-----------|----------|
| 35 | C  | 6.798687  | 9.812491  | 2.810816 |
| 36 | C  | 6.798882  | 9.814936  | 7.070957 |
| 37 | C  | 7.056509  | 8.587899  | 3.534689 |
| 38 | C  | 7.059588  | 8.591607  | 7.794835 |
| 39 | C  | 7.059506  | 8.591493  | 0.680498 |
| 40 | C  | 7.056545  | 8.587905  | 4.940676 |
| 41 | C  | 7.741231  | 7.560885  | 1.410507 |
| 42 | C  | 7.734435  | 7.553888  | 5.670019 |
| 43 | C  | 7.734734  | 7.554195  | 2.805252 |
| 44 | C  | 7.741534  | 7.561219  | 7.064756 |
| 45 | C  | 8.784986  | 6.901907  | 3.534601 |
| 46 | C  | 8.788379  | 6.904824  | 7.794711 |
| 47 | C  | 8.788321  | 6.904750  | 0.680628 |
| 48 | C  | 8.784991  | 6.901931  | 4.940781 |
| 49 | C  | 10.017571 | 6.672815  | 1.404149 |
| 50 | C  | 10.015590 | 6.672637  | 5.664169 |
| 51 | C  | 10.015534 | 6.672600  | 2.811167 |
| 52 | C  | 10.017567 | 6.672809  | 7.071177 |
| 53 | C  | 11.239669 | 6.930052  | 3.534762 |
| 54 | C  | 11.242968 | 6.927705  | 7.794607 |
| 55 | C  | 11.243051 | 6.927621  | 0.680706 |
| 56 | C  | 11.239784 | 6.929968  | 4.940545 |
| 57 | C  | 12.279408 | 7.601489  | 1.410028 |
| 58 | C  | 12.273138 | 7.607511  | 5.670428 |
| 59 | C  | 12.272604 | 7.608037  | 2.804722 |
| 60 | C  | 12.278927 | 7.601954  | 7.065131 |
| 61 | C  | 12.930630 | 8.654022  | 3.534680 |
| 62 | C  | 12.932852 | 8.651371  | 7.794507 |
| 63 | C  | 12.932970 | 8.651233  | 0.680733 |
| 64 | C  | 12.930727 | 8.653890  | 4.940579 |
| 65 | Li | 9.938692  | 14.533032 | 4.236824 |
| 66 | Li | 14.640837 | 9.895365  | 8.497611 |
| 67 | Li | 5.319347  | 9.804469  | 8.497662 |
| 68 | Li | 5.318858  | 9.805881  | 4.237731 |
| 69 | Li | 14.640521 | 9.893805  | 4.237657 |
| 70 | Li | 10.025668 | 5.192145  | 4.237666 |
| 71 | Li | 10.033227 | 5.192595  | 8.497659 |
| 72 | Li | 9.924784  | 14.513216 | 8.497883 |
| 73 | H  | 11.447335 | 15.781563 | 4.218524 |
| 74 | H  | 11.719060 | 15.039618 | 4.216042 |

---

|       | Total Energy  | Energy change | Max Gradient | Max Displacement |
|-------|---------------|---------------|--------------|------------------|
| opt== | -2478.6115645 | -0.0000095    | 0.001183     | 0.013384         |

## 2. H<sub>2</sub>/Li<sub>8</sub>/SWCN Bridge site $F = +0.010$ au

Coordinates (Angstroms)

| ----- |      |           |           |          |
|-------|------|-----------|-----------|----------|
|       | ATOM | X         | Y         | Z        |
| 1     | C    | 13.205352 | 9.803740  | 1.398441 |
| 2     | C    | 13.266530 | 9.808774  | 5.657996 |
| 3     | C    | 13.204990 | 9.803230  | 2.809402 |
| 4     | C    | 13.266898 | 9.809275  | 7.069969 |
| 5     | C    | 13.061924 | 11.042036 | 3.524917 |
| 6     | C    | 13.069319 | 11.038226 | 7.785562 |
| 7     | C    | 13.062579 | 11.043292 | 0.683238 |
| 8     | C    | 13.069121 | 11.037335 | 4.941999 |
| 9     | C    | 12.299160 | 12.040531 | 1.407408 |
| 10    | C    | 12.305527 | 12.024376 | 5.665067 |
| 11    | C    | 12.297478 | 12.038367 | 2.800257 |
| 12    | C    | 12.306685 | 12.025731 | 7.062832 |
| 13    | C    | 11.194578 | 12.609693 | 3.531869 |
| 14    | C    | 11.198714 | 12.603287 | 7.791419 |
| 15    | C    | 11.196930 | 12.613067 | 0.675502 |
| 16    | C    | 11.196531 | 12.600198 | 4.936732 |
| 17    | C    | 9.962458  | 12.828732 | 1.400313 |
| 18    | C    | 9.961952  | 12.812093 | 5.659839 |
| 19    | C    | 9.961851  | 12.830403 | 2.808153 |
| 20    | C    | 9.962642  | 12.810858 | 7.067118 |
| 21    | C    | 8.724609  | 12.615566 | 3.533025 |
| 22    | C    | 8.724900  | 12.605431 | 7.791792 |
| 23    | C    | 8.726468  | 12.614994 | 0.675278 |
| 24    | C    | 8.722999  | 12.605849 | 4.935218 |
| 25    | C    | 7.630418  | 12.030047 | 1.407535 |
| 26    | C    | 7.624019  | 12.013453 | 5.664291 |
| 27    | C    | 7.630567  | 12.029494 | 2.800533 |
| 28    | C    | 7.624282  | 12.013978 | 7.062711 |
| 29    | C    | 6.885465  | 11.017471 | 3.524735 |
| 30    | C    | 6.882246  | 11.011608 | 7.785675 |
| 31    | C    | 6.886761  | 11.017610 | 0.682849 |
| 32    | C    | 6.880833  | 11.011156 | 4.941721 |
| 33    | C    | 6.780607  | 9.774695  | 1.398287 |
| 34    | C    | 6.713739  | 9.777963  | 5.657596 |
| 35    | C    | 6.781019  | 9.774661  | 2.809209 |
| 36    | C    | 6.715748  | 9.778303  | 7.069882 |
| 37    | C    | 7.086333  | 8.598748  | 3.531208 |
| 38    | C    | 7.065112  | 8.600704  | 7.786550 |
| 39    | C    | 7.086621  | 8.598874  | 0.676463 |

|    |    |           |           |          |
|----|----|-----------|-----------|----------|
| 40 | C  | 7.063463  | 8.600063  | 4.941105 |
| 41 | C  | 7.772670  | 7.598443  | 1.400577 |
| 42 | C  | 7.762505  | 7.604797  | 5.660743 |
| 43 | C  | 7.772681  | 7.598500  | 2.807164 |
| 44 | C  | 7.763344  | 7.605307  | 7.066793 |
| 45 | C  | 8.798077  | 6.920991  | 3.530895 |
| 46 | C  | 8.796645  | 6.930683  | 7.789342 |
| 47 | C  | 8.798110  | 6.920872  | 0.676843 |
| 48 | C  | 8.796353  | 6.930715  | 4.938385 |
| 49 | C  | 10.015201 | 6.659709  | 1.396806 |
| 50 | C  | 10.014912 | 6.677723  | 5.657250 |
| 51 | C  | 10.015169 | 6.659686  | 2.810973 |
| 52 | C  | 10.015110 | 6.677775  | 7.070523 |
| 53 | C  | 11.231578 | 6.924855  | 3.531062 |
| 54 | C  | 11.233007 | 6.934878  | 7.789531 |
| 55 | C  | 11.231546 | 6.925363  | 0.676720 |
| 56 | C  | 11.232839 | 6.934520  | 4.938312 |
| 57 | C  | 12.251890 | 7.611164  | 1.400555 |
| 58 | C  | 12.261219 | 7.617096  | 5.660932 |
| 59 | C  | 12.252230 | 7.610315  | 2.807221 |
| 60 | C  | 12.261413 | 7.617484  | 7.067004 |
| 61 | C  | 12.924345 | 8.620613  | 3.531327 |
| 62 | C  | 12.945488 | 8.623544  | 7.786790 |
| 63 | C  | 12.924664 | 8.621301  | 0.676488 |
| 64 | C  | 12.944755 | 8.623079  | 4.941066 |
| 65 | Li | 9.963112  | 14.373816 | 4.244585 |
| 66 | Li | 15.339627 | 10.950935 | 0.654081 |
| 67 | Li | 4.603220  | 10.746454 | 0.641037 |
| 68 | Li | 4.601201  | 10.745154 | 3.563838 |
| 69 | Li | 15.345947 | 10.915245 | 3.574987 |
| 70 | Li | 10.013732 | 5.121815  | 4.242662 |
| 71 | Li | 10.014143 | 5.121948  | 8.485165 |
| 72 | Li | 9.966385  | 14.365648 | 8.483334 |
| 73 | H  | 11.507097 | 15.673137 | 4.255989 |
| 74 | H  | 11.772172 | 14.938007 | 4.251612 |

---

|       | Total Energy  | Energy change | Max Gradient | Max Displacement |
|-------|---------------|---------------|--------------|------------------|
| opt== | -2479.0370743 | -0.0000058    | 0.000614     | 0.024378         |

### 3. H<sub>2</sub>/Li<sub>8</sub>/SWCN Bridge site $F = -0.010$ au

Coordinates (Angstroms)

---

|    | ATOM | X         | Y         | Z        |
|----|------|-----------|-----------|----------|
| 1  | C    | 14.110402 | 9.994168  | 1.375460 |
| 2  | C    | 14.108708 | 9.993978  | 5.637429 |
| 3  | C    | 14.110999 | 9.993344  | 2.847869 |
| 4  | C    | 14.107182 | 9.994654  | 7.107081 |
| 5  | C    | 13.380232 | 11.069665 | 3.543353 |
| 6  | C    | 13.381409 | 11.070583 | 7.801238 |
| 7  | C    | 13.379240 | 11.071226 | 0.680923 |
| 8  | C    | 13.381097 | 11.068166 | 4.942749 |
| 9  | C    | 12.337432 | 11.682374 | 1.408147 |
| 10 | C    | 12.335568 | 11.679268 | 5.667031 |
| 11 | C    | 12.336599 | 11.678590 | 2.815931 |
| 12 | C    | 12.336822 | 11.683390 | 7.077083 |
| 13 | C    | 11.156768 | 11.998247 | 3.530109 |
| 14 | C    | 11.158569 | 12.013495 | 7.789648 |
| 15 | C    | 11.159828 | 12.010856 | 0.694202 |
| 16 | C    | 11.155904 | 12.002427 | 4.953836 |
| 17 | C    | 9.929736  | 12.108862 | 1.399068 |
| 18 | C    | 9.928731  | 12.110578 | 5.659757 |
| 19 | C    | 9.928876  | 12.105794 | 2.825499 |
| 20 | C    | 9.929662  | 12.111574 | 7.083459 |
| 21 | C    | 8.700052  | 12.004547 | 3.530363 |
| 22 | C    | 8.701778  | 12.002456 | 7.789775 |
| 23 | C    | 8.701287  | 12.001644 | 0.693874 |
| 24 | C    | 8.700096  | 12.006228 | 4.954409 |
| 25 | C    | 7.529051  | 11.651665 | 1.408700 |
| 26 | C    | 7.529046  | 11.651799 | 5.667425 |
| 27 | C    | 7.528913  | 11.652300 | 2.815528 |
| 28 | C    | 7.530066  | 11.649249 | 7.076724 |
| 29 | C    | 6.509790  | 11.001803 | 3.544072 |
| 30 | C    | 6.508786  | 10.999190 | 7.802247 |
| 31 | C    | 6.508519  | 11.002981 | 0.680433 |
| 32 | C    | 6.507698  | 11.000619 | 4.942434 |
| 33 | C    | 5.841582  | 9.883577  | 1.375828 |
| 34 | C    | 5.837558  | 9.883362  | 5.634744 |
| 35 | C    | 5.842022  | 9.883902  | 2.848645 |
| 36 | C    | 5.836587  | 9.883053  | 7.109694 |
| 37 | C    | 6.490267  | 8.728096  | 3.529956 |
| 38 | C    | 6.488971  | 8.728715  | 7.791317 |
| 39 | C    | 6.490269  | 8.727667  | 0.694451 |
| 40 | C    | 6.488796  | 8.728128  | 4.953040 |
| 41 | C    | 7.565091  | 8.100515  | 1.409014 |
| 42 | C    | 7.564635  | 8.102441  | 5.670472 |

|    |    |           |           |          |
|----|----|-----------|-----------|----------|
| 43 | C  | 7.566298  | 8.103182  | 2.815071 |
| 44 | C  | 7.565573  | 8.105279  | 7.073572 |
| 45 | C  | 8.778578  | 7.852702  | 3.533584 |
| 46 | C  | 8.778429  | 7.856275  | 7.793906 |
| 47 | C  | 8.778058  | 7.851977  | 0.690978 |
| 48 | C  | 8.777985  | 7.856161  | 4.950673 |
| 49 | C  | 10.025914 | 7.775959  | 1.408357 |
| 50 | C  | 10.026154 | 7.783475  | 5.667107 |
| 51 | C  | 10.026181 | 7.776119  | 2.815892 |
| 52 | C  | 10.026331 | 7.783650  | 7.077185 |
| 53 | C  | 11.273232 | 7.862199  | 3.533607 |
| 54 | C  | 11.272877 | 7.865843  | 7.793717 |
| 55 | C  | 11.272787 | 7.862591  | 0.690719 |
| 56 | C  | 11.272748 | 7.865862  | 4.950533 |
| 57 | C  | 12.480779 | 8.135744  | 1.410272 |
| 58 | C  | 12.482042 | 8.136387  | 5.671485 |
| 59 | C  | 12.481691 | 8.133386  | 2.814337 |
| 60 | C  | 12.482851 | 8.134545  | 7.072981 |
| 61 | C  | 13.534550 | 8.799590  | 3.530158 |
| 62 | C  | 13.537111 | 8.799190  | 7.792498 |
| 63 | C  | 13.533463 | 8.800563  | 0.693883 |
| 64 | C  | 13.537385 | 8.798945  | 4.951899 |
| 65 | Li | 9.957687  | 13.740076 | 4.221062 |
| 66 | Li | 15.426600 | 9.028879  | 8.509457 |
| 67 | Li | 4.596948  | 8.845471  | 8.500739 |
| 68 | Li | 4.596137  | 8.845118  | 4.243882 |
| 69 | Li | 15.429584 | 9.026823  | 4.239171 |
| 70 | Li | 10.035360 | 6.173111  | 4.258695 |
| 71 | Li | 10.035562 | 6.170859  | 8.482997 |
| 72 | Li | 9.921923  | 13.731951 | 8.516169 |
| 73 | H  | 11.367802 | 15.189468 | 4.034792 |
| 74 | H  | 11.747710 | 14.515152 | 4.083176 |

-----  
 Total Energy    Energy change    Max Gradient    Max Displacement  
 opt== -2479.1040591    -0.0000082    0.001782    0.007262

#### 4. H<sub>2</sub>/Li<sub>8</sub>/SWCN Middle site $F = 0.000$ au

Coordinates (Angstroms)

-----

|  | ATOM   | X         | Y        | Z        |
|--|--------|-----------|----------|----------|
|  | 1    C | 13.174050 | 9.865433 | 1.404018 |

Supplementary Material (ESI) for *PCCP*  
This journal is © the Owner Societies 2009

|    |   |           |           |          |
|----|---|-----------|-----------|----------|
| 2  | C | 13.176543 | 9.864696  | 5.663979 |
| 3  | C | 13.174505 | 9.865178  | 2.810742 |
| 4  | C | 13.176146 | 9.864929  | 7.070812 |
| 5  | C | 12.924629 | 11.090182 | 3.534604 |
| 6  | C | 12.925609 | 11.090759 | 7.794770 |
| 7  | C | 12.924848 | 11.091095 | 0.680258 |
| 8  | C | 12.925272 | 11.089840 | 4.939892 |
| 9  | C | 12.250040 | 12.128852 | 1.409724 |
| 10 | C | 12.250182 | 12.124896 | 5.670409 |
| 11 | C | 12.246726 | 12.125424 | 2.804511 |
| 12 | C | 12.253585 | 12.128265 | 7.064844 |
| 13 | C | 11.198242 | 12.780497 | 3.534228 |
| 14 | C | 11.200295 | 12.780054 | 7.793895 |
| 15 | C | 11.199451 | 12.781887 | 0.680631 |
| 16 | C | 11.199155 | 12.778997 | 4.940699 |
| 17 | C | 9.969920  | 13.006696 | 1.404313 |
| 18 | C | 9.969692  | 12.993034 | 5.664043 |
| 19 | C | 9.969632  | 13.006919 | 2.810384 |
| 20 | C | 9.969971  | 12.991782 | 7.070704 |
| 21 | C | 8.743408  | 12.766299 | 3.534170 |
| 22 | C | 8.742982  | 12.763737 | 7.794032 |
| 23 | C | 8.743885  | 12.765464 | 0.680519 |
| 24 | C | 8.742457  | 12.764862 | 4.940718 |
| 25 | C | 7.702667  | 12.098347 | 1.409972 |
| 26 | C | 7.699973  | 12.096856 | 5.670480 |
| 27 | C | 7.703326  | 12.097547 | 2.804461 |
| 28 | C | 7.698916  | 12.097959 | 7.064619 |
| 29 | C | 7.038214  | 11.053700 | 3.534325 |
| 30 | C | 7.037195  | 11.053586 | 7.794594 |
| 31 | C | 7.037957  | 11.053932 | 0.680390 |
| 32 | C | 7.037586  | 11.053260 | 4.940192 |
| 33 | C | 6.803346  | 9.825185  | 1.403949 |
| 34 | C | 6.801251  | 9.824512  | 5.663911 |
| 35 | C | 6.803416  | 9.825103  | 2.810803 |
| 36 | C | 6.801163  | 9.824649  | 7.070873 |
| 37 | C | 7.060074  | 8.601365  | 3.534675 |
| 38 | C | 7.059745  | 8.601484  | 7.794843 |
| 39 | C | 7.060030  | 8.601467  | 0.680013 |
| 40 | C | 7.059747  | 8.601320  | 4.939997 |
| 41 | C | 7.735542  | 7.565857  | 1.409793 |
| 42 | C | 7.735520  | 7.566165  | 5.670107 |
| 43 | C | 7.735623  | 7.566028  | 2.804699 |
| 44 | C | 7.735549  | 7.566119  | 7.064937 |
| 45 | C | 8.780841  | 6.905451  | 3.534577 |

|    |    |           |           |          |
|----|----|-----------|-----------|----------|
| 46 | C  | 8.781405  | 6.906637  | 7.794677 |
| 47 | C  | 8.781442  | 6.906517  | 0.680120 |
| 48 | C  | 8.780776  | 6.905538  | 4.940209 |
| 49 | C  | 10.008760 | 6.668116  | 1.403996 |
| 50 | C  | 10.008703 | 6.668567  | 5.664000 |
| 51 | C  | 10.008720 | 6.667908  | 2.810872 |
| 52 | C  | 10.008754 | 6.668772  | 7.070727 |
| 53 | C  | 11.233019 | 6.921170  | 3.534679 |
| 54 | C  | 11.233906 | 6.920156  | 7.794581 |
| 55 | C  | 11.233869 | 6.920049  | 0.680230 |
| 56 | C  | 11.233042 | 6.921286  | 4.940113 |
| 57 | C  | 12.271194 | 7.593509  | 1.409978 |
| 58 | C  | 12.269324 | 7.595405  | 5.670297 |
| 59 | C  | 12.269358 | 7.595153  | 2.804545 |
| 60 | C  | 12.271187 | 7.593728  | 7.064780 |
| 61 | C  | 12.933839 | 8.638071  | 3.534556 |
| 62 | C  | 12.933692 | 8.638047  | 7.794561 |
| 63 | C  | 12.933460 | 8.638027  | 0.680292 |
| 64 | C  | 12.934047 | 8.638102  | 4.940165 |
| 65 | Li | 9.950300  | 14.518327 | 4.248267 |
| 66 | Li | 14.676186 | 9.866262  | 8.498711 |
| 67 | Li | 5.300361  | 9.851148  | 8.498746 |
| 68 | Li | 5.300640  | 9.849527  | 4.236049 |
| 69 | Li | 14.676729 | 9.862722  | 4.236114 |
| 70 | Li | 10.002050 | 5.165335  | 4.237713 |
| 71 | Li | 10.038540 | 5.166558  | 8.497092 |
| 72 | Li | 9.974125  | 14.517905 | 8.485347 |
| 73 | H  | 9.972625  | 15.962455 | 6.390071 |
| 74 | H  | 9.970746  | 15.167041 | 6.379172 |

-----  
 Total Energy    Energy change    Max Gradient    Max Displacement  
 opt== -2478.6099125    -0.0000199    0.002023    0.020924

## 5. H<sub>2</sub>/Li<sub>8</sub>/SWCN Middle site *F* = +0.010 au

Coordinates (Angstroms)

-----

|  | ATOM | X | Y         | Z        |          |
|--|------|---|-----------|----------|----------|
|  | 1    | C | 13.214389 | 9.832438 | 1.411048 |
|  | 2    | C | 13.279676 | 9.838614 | 5.670416 |
|  | 3    | C | 13.214298 | 9.832533 | 2.821985 |
|  | 4    | C | 13.279443 | 9.838591 | 7.082838 |

Supplementary Material (ESI) for *PCCP*  
This journal is © the Owner Societies 2009

|    |   |           |           |          |
|----|---|-----------|-----------|----------|
| 5  | C | 13.058794 | 11.070126 | 3.537072 |
| 6  | C | 13.068835 | 11.065111 | 7.799038 |
| 7  | C | 13.059129 | 11.070007 | 0.695774 |
| 8  | C | 13.070148 | 11.065590 | 4.954320 |
| 9  | C | 12.286016 | 12.059388 | 1.419779 |
| 10 | C | 12.297996 | 12.045168 | 5.677763 |
| 11 | C | 12.285744 | 12.059544 | 2.812806 |
| 12 | C | 12.296897 | 12.045356 | 7.075073 |
| 13 | C | 11.180424 | 12.625491 | 3.544278 |
| 14 | C | 11.183628 | 12.613751 | 7.803464 |
| 15 | C | 11.180343 | 12.623477 | 0.687780 |
| 16 | C | 11.182477 | 12.610365 | 4.948874 |
| 17 | C | 9.941971  | 12.820169 | 1.413197 |
| 18 | C | 9.942851  | 12.781306 | 5.671657 |
| 19 | C | 9.941813  | 12.820062 | 2.819700 |
| 20 | C | 9.942841  | 12.798494 | 7.079396 |
| 21 | C | 8.704692  | 12.617252 | 3.544177 |
| 22 | C | 8.702923  | 12.605020 | 7.803614 |
| 23 | C | 8.704863  | 12.614896 | 0.687965 |
| 24 | C | 8.703875  | 12.602514 | 4.948669 |
| 25 | C | 7.606971  | 12.032855 | 1.419877 |
| 26 | C | 7.599019  | 12.015706 | 5.677619 |
| 27 | C | 7.607051  | 12.033325 | 2.812816 |
| 28 | C | 7.600251  | 12.015595 | 7.075171 |
| 29 | C | 6.866609  | 11.017383 | 3.537388 |
| 30 | C | 6.863925  | 11.009094 | 7.799352 |
| 31 | C | 6.866682  | 11.016987 | 0.695505 |
| 32 | C | 6.862423  | 11.009725 | 4.954000 |
| 33 | C | 6.778896  | 9.772763  | 1.411123 |
| 34 | C | 6.711472  | 9.774591  | 5.670477 |
| 35 | C | 6.779289  | 9.773083  | 2.822086 |
| 36 | C | 6.711421  | 9.774363  | 7.082826 |
| 37 | C | 7.099476  | 8.601363  | 3.544303 |
| 38 | C | 7.075183  | 8.600471  | 7.798967 |
| 39 | C | 7.098686  | 8.600887  | 0.689016 |
| 40 | C | 7.076574  | 8.601613  | 4.954321 |
| 41 | C | 7.792523  | 7.605963  | 1.413404 |
| 42 | C | 7.782030  | 7.610882  | 5.673445 |
| 43 | C | 7.792586  | 7.606052  | 2.819965 |
| 44 | C | 7.782087  | 7.611032  | 7.079670 |
| 45 | C | 8.821707  | 6.934571  | 3.543468 |
| 46 | C | 8.819948  | 6.944029  | 7.802033 |
| 47 | C | 8.821608  | 6.934533  | 0.689911 |
| 48 | C | 8.819965  | 6.944109  | 4.951317 |

|    |    |           |           |           |
|----|----|-----------|-----------|-----------|
| 49 | C  | 10.039677 | 6.677473  | 1.409381  |
| 50 | C  | 10.039449 | 6.695936  | 5.669721  |
| 51 | C  | 10.039699 | 6.677760  | 2.824101  |
| 52 | C  | 10.039458 | 6.696242  | 7.083644  |
| 53 | C  | 11.255034 | 6.946647  | 3.543754  |
| 54 | C  | 11.256446 | 6.956853  | 7.802031  |
| 55 | C  | 11.255033 | 6.946624  | 0.689607  |
| 56 | C  | 11.256418 | 6.956988  | 4.951295  |
| 57 | C  | 12.273642 | 7.634772  | 1.413405  |
| 58 | C  | 12.282830 | 7.641965  | 5.673621  |
| 59 | C  | 12.273603 | 7.634980  | 2.819889  |
| 60 | C  | 12.282892 | 7.641848  | 7.079516  |
| 61 | C  | 12.941617 | 8.648237  | 3.544419  |
| 62 | C  | 12.963017 | 8.650614  | 7.799355  |
| 63 | C  | 12.941284 | 8.648226  | 0.688704  |
| 64 | C  | 12.962443 | 8.651250  | 4.953886  |
| 65 | Li | 9.942157  | 14.371844 | 4.271379  |
| 66 | Li | 15.335587 | 10.948227 | 9.176424  |
| 67 | Li | 4.558731  | 10.631312 | 9.186991  |
| 68 | Li | 4.558607  | 10.642750 | 3.571761  |
| 69 | Li | 15.333302 | 10.962249 | 3.582806  |
| 70 | Li | 10.043392 | 5.133212  | 4.255953  |
| 71 | Li | 10.040292 | 5.133179  | 8.497740  |
| 72 | Li | 9.933306  | 14.361539 | -0.017538 |
| 73 | H  | 10.002335 | 15.715586 | 5.908477  |
| 74 | H  | 9.978237  | 14.954701 | 6.122616  |

-----

|       | Total Energy  | Energy change | Max Gradient | Max Displacement |
|-------|---------------|---------------|--------------|------------------|
| opt== | -2479.0365066 | -0.0000197    | 0.000634     | 0.043164         |

## 6. H<sub>2</sub>/Li<sub>8</sub>/SWCN Middle site $F = -0.010$ au

Coordinates (Angstroms)

-----

|   | ATOM | X         | Y         | Z        |
|---|------|-----------|-----------|----------|
| 1 | C    | 14.085128 | 9.992946  | 1.372191 |
| 2 | C    | 14.076452 | 9.999257  | 5.636421 |
| 3 | C    | 14.082575 | 9.990671  | 2.842815 |
| 4 | C    | 14.074247 | 9.997820  | 7.099123 |
| 5 | C    | 13.365744 | 11.072931 | 3.538378 |
| 6 | C    | 13.366398 | 11.076075 | 7.799800 |
| 7 | C    | 13.373335 | 11.080648 | 0.679205 |

Supplementary Material (ESI) for *PCCP*  
This journal is © the Owner Societies 2009

|    |   |           |           |          |
|----|---|-----------|-----------|----------|
| 8  | C | 13.375858 | 11.085165 | 4.937522 |
| 9  | C | 12.339769 | 11.711738 | 1.404354 |
| 10 | C | 12.340832 | 11.712651 | 5.663544 |
| 11 | C | 12.339771 | 11.714653 | 2.812089 |
| 12 | C | 12.342445 | 11.719085 | 7.072343 |
| 13 | C | 11.166857 | 12.057681 | 3.524238 |
| 14 | C | 11.166694 | 12.053936 | 7.786673 |
| 15 | C | 11.167734 | 12.057467 | 0.691376 |
| 16 | C | 11.165028 | 12.047956 | 4.948417 |
| 17 | C | 9.936231  | 12.145351 | 1.396536 |
| 18 | C | 9.936369  | 12.142971 | 5.655130 |
| 19 | C | 9.935443  | 12.147708 | 2.819612 |
| 20 | C | 9.936613  | 12.150790 | 7.079410 |
| 21 | C | 8.709925  | 12.018545 | 3.526282 |
| 22 | C | 8.707682  | 12.026146 | 7.785012 |
| 23 | C | 8.710985  | 12.016099 | 0.689163 |
| 24 | C | 8.708124  | 12.022503 | 4.950161 |
| 25 | C | 7.545297  | 11.648027 | 1.403629 |
| 26 | C | 7.544499  | 11.645290 | 5.663561 |
| 27 | C | 7.542134  | 11.654988 | 2.812495 |
| 28 | C | 7.545036  | 11.645961 | 7.071775 |
| 29 | C | 6.532960  | 10.986756 | 3.539250 |
| 30 | C | 6.530169  | 10.988769 | 7.798064 |
| 31 | C | 6.532714  | 10.986037 | 0.676415 |
| 32 | C | 6.523665  | 10.995292 | 4.938109 |
| 33 | C | 5.860862  | 9.873575  | 1.371913 |
| 34 | C | 5.861643  | 9.873825  | 5.630555 |
| 35 | C | 5.860858  | 9.874143  | 2.843008 |
| 36 | C | 5.862086  | 9.872129  | 7.104445 |
| 37 | C | 6.493586  | 8.709453  | 3.524791 |
| 38 | C | 6.503430  | 8.716179  | 7.787548 |
| 39 | C | 6.493120  | 8.708482  | 0.689833 |
| 40 | C | 6.504280  | 8.719154  | 4.946831 |
| 41 | C | 7.569143  | 8.084606  | 1.405875 |
| 42 | C | 7.572417  | 8.080698  | 5.665674 |
| 43 | C | 7.569560  | 8.084990  | 2.808850 |
| 44 | C | 7.570870  | 8.076685  | 7.068747 |
| 45 | C | 8.780498  | 7.831384  | 3.530309 |
| 46 | C | 8.777190  | 7.800923  | 7.787601 |
| 47 | C | 8.779342  | 7.830186  | 0.684055 |
| 48 | C | 8.778106  | 7.802949  | 4.946635 |
| 49 | C | 10.022685 | 7.740998  | 1.403440 |
| 50 | C | 10.028238 | 7.742575  | 5.663007 |
| 51 | C | 10.023943 | 7.740775  | 2.811264 |

|    |    |           |           |          |
|----|----|-----------|-----------|----------|
| 52 | C  | 10.028007 | 7.742287  | 7.071429 |
| 53 | C  | 11.274445 | 7.813445  | 3.526229 |
| 54 | C  | 11.269674 | 7.847964  | 7.791324 |
| 55 | C  | 11.271526 | 7.817327  | 0.687781 |
| 56 | C  | 11.269318 | 7.848058  | 4.942580 |
| 57 | C  | 12.471470 | 8.123842  | 1.406490 |
| 58 | C  | 12.474314 | 8.126461  | 5.666507 |
| 59 | C  | 12.478784 | 8.108734  | 2.808918 |
| 60 | C  | 12.476445 | 8.120780  | 7.068085 |
| 61 | C  | 13.512398 | 8.803169  | 3.529411 |
| 62 | C  | 13.527711 | 8.794340  | 7.783753 |
| 63 | C  | 13.509637 | 8.807976  | 0.684600 |
| 64 | C  | 13.525478 | 8.797604  | 4.950422 |
| 65 | Li | 9.916267  | 13.765065 | 4.242131 |
| 66 | Li | 15.426964 | 9.007189  | 8.511410 |
| 67 | Li | 4.602629  | 8.840326  | 8.510917 |
| 68 | Li | 4.603217  | 8.840449  | 4.223771 |
| 69 | Li | 15.428917 | 8.999290  | 4.239404 |
| 70 | Li | 10.040691 | 6.134889  | 4.250572 |
| 71 | Li | 10.041489 | 6.134908  | 8.484593 |
| 72 | Li | 9.912558  | 13.760298 | 8.508427 |
| 73 | H  | 9.961205  | 15.398592 | 5.716138 |
| 74 | H  | 9.960208  | 14.677736 | 6.002081 |

-----

|       | Total Energy  | Energy change | Max Gradient | Max Displacement |
|-------|---------------|---------------|--------------|------------------|
| opt== | -2479.1005756 | 0.0000522     | 0.004376     | 0.016226         |

## 7. H<sub>2</sub>/Li<sub>8</sub>/SWCN Atop site $F = 0.000$ au

Coordinates (Angstroms)

-----

|    | ATOM | X         | Y         | Z        |
|----|------|-----------|-----------|----------|
| 1  | C    | 13.160224 | 9.871692  | 1.406877 |
| 2  | C    | 13.159300 | 9.871849  | 5.666811 |
| 3  | C    | 13.159420 | 9.871805  | 2.813886 |
| 4  | C    | 13.159927 | 9.871839  | 7.073857 |
| 5  | C    | 12.897514 | 11.095696 | 3.537606 |
| 6  | C    | 12.898101 | 11.094990 | 7.797709 |
| 7  | C    | 12.898084 | 11.094668 | 0.683100 |
| 8  | C    | 12.897147 | 11.095532 | 4.943091 |
| 9  | C    | 12.211417 | 12.122147 | 1.414057 |
| 10 | C    | 12.216063 | 12.127573 | 5.673030 |

Supplementary Material (ESI) for *PCCP*  
This journal is © the Owner Societies 2009

|    |   |           |           |          |
|----|---|-----------|-----------|----------|
| 11 | C | 12.217424 | 12.128746 | 2.808159 |
| 12 | C | 12.212681 | 12.123629 | 7.067203 |
| 13 | C | 11.165937 | 12.779971 | 3.537816 |
| 14 | C | 11.164538 | 12.778477 | 7.797544 |
| 15 | C | 11.164169 | 12.777948 | 0.683113 |
| 16 | C | 11.165817 | 12.780176 | 4.943503 |
| 17 | C | 9.935864  | 13.008552 | 1.407251 |
| 18 | C | 9.936483  | 13.009264 | 5.666862 |
| 19 | C | 9.936509  | 13.008838 | 2.814380 |
| 20 | C | 9.935887  | 13.008416 | 7.073297 |
| 21 | C | 8.711435  | 12.755103 | 3.538055 |
| 22 | C | 8.710990  | 12.755795 | 7.797575 |
| 23 | C | 8.711290  | 12.755448 | 0.683074 |
| 24 | C | 8.711500  | 12.755170 | 4.943323 |
| 25 | C | 7.677119  | 12.078789 | 1.413366 |
| 26 | C | 7.676107  | 12.080635 | 5.673055 |
| 27 | C | 7.675073  | 12.081534 | 2.808045 |
| 28 | C | 7.676194  | 12.079756 | 7.067824 |
| 29 | C | 7.022403  | 11.030795 | 3.537446 |
| 30 | C | 7.022696  | 11.030154 | 7.797495 |
| 31 | C | 7.022733  | 11.029958 | 0.683403 |
| 32 | C | 7.022630  | 11.030674 | 4.943231 |
| 33 | C | 6.794809  | 9.799464  | 1.406939 |
| 34 | C | 6.794656  | 9.800095  | 5.666962 |
| 35 | C | 6.794660  | 9.800033  | 2.813788 |
| 36 | C | 6.795011  | 9.799538  | 7.073864 |
| 37 | C | 7.058435  | 8.576834  | 3.537678 |
| 38 | C | 7.057469  | 8.575950  | 7.797589 |
| 39 | C | 7.057594  | 8.576066  | 0.683135 |
| 40 | C | 7.058600  | 8.577027  | 4.943065 |
| 41 | C | 7.739745  | 7.545279  | 1.413308 |
| 42 | C | 7.742216  | 7.547661  | 5.673414 |
| 43 | C | 7.741247  | 7.546677  | 2.807561 |
| 44 | C | 7.738845  | 7.544348  | 7.067642 |
| 45 | C | 8.789846  | 6.892016  | 3.537507 |
| 46 | C | 8.788199  | 6.890782  | 7.797457 |
| 47 | C | 8.788378  | 6.890928  | 0.683242 |
| 48 | C | 8.790019  | 6.892174  | 4.943181 |
| 49 | C | 10.018124 | 6.659501  | 1.406737 |
| 50 | C | 10.019397 | 6.659693  | 5.666761 |
| 51 | C | 10.019374 | 6.659707  | 2.813932 |
| 52 | C | 10.018094 | 6.659523  | 7.073948 |
| 53 | C | 11.244621 | 6.914793  | 3.537408 |
| 54 | C | 11.242581 | 6.916063  | 7.797451 |

|    |    |           |           |          |
|----|----|-----------|-----------|----------|
| 55 | C  | 11.242485 | 6.916148  | 0.683216 |
| 56 | C  | 11.244516 | 6.914884  | 4.943249 |
| 57 | C  | 12.275917 | 7.593950  | 1.413618 |
| 58 | C  | 12.281089 | 7.589001  | 5.672702 |
| 59 | C  | 12.281807 | 7.588315  | 2.808160 |
| 60 | C  | 12.276552 | 7.593319  | 7.067221 |
| 61 | C  | 12.931564 | 8.640777  | 3.537390 |
| 62 | C  | 12.931319 | 8.641878  | 7.797424 |
| 63 | C  | 12.931238 | 8.641921  | 0.683227 |
| 64 | C  | 12.931429 | 8.640911  | 4.943294 |
| 65 | Li | 9.954856  | 14.510595 | 4.230903 |
| 66 | Li | 14.658183 | 9.886614  | 8.500256 |
| 67 | Li | 5.297050  | 9.788966  | 8.500307 |
| 68 | Li | 5.297022  | 9.789697  | 4.240405 |
| 69 | Li | 14.657693 | 9.885103  | 4.240462 |
| 70 | Li | 10.026810 | 5.160592  | 4.240386 |
| 71 | Li | 10.036310 | 5.160756  | 8.500349 |
| 72 | Li | 9.924526  | 14.514122 | 8.503634 |
| 73 | H  | 9.989443  | 16.406516 | 3.639974 |
| 74 | H  | 9.990923  | 16.474516 | 4.413652 |

-----  
 Total Energy    Energy change    Max Gradient    Max Displacement  
 opt== -2478.6062949    0.0000108    0.001758    0.034076

### 8. H<sub>2</sub>/Li<sub>8</sub>/SWCN Atop site $F = +0.010$ au

Coordinates (Angstroms)

-----

|  | ATOM | X | Y         | Z         |          |
|--|------|---|-----------|-----------|----------|
|  | 1    | C | 13.220984 | 9.803787  | 1.406133 |
|  | 2    | C | 13.222252 | 9.803724  | 5.665970 |
|  | 3    | C | 13.220866 | 9.803698  | 2.817816 |
|  | 4    | C | 13.222372 | 9.803757  | 7.077718 |
|  | 5    | C | 13.065131 | 11.040879 | 3.533348 |
|  | 6    | C | 13.067404 | 11.041012 | 7.793489 |
|  | 7    | C | 13.066383 | 11.041064 | 0.690593 |
|  | 8    | C | 13.066379 | 11.041016 | 4.950334 |
|  | 9    | C | 12.308177 | 12.038021 | 1.414799 |
|  | 10   | C | 12.307740 | 12.037440 | 5.674668 |
|  | 11   | C | 12.306810 | 12.037699 | 2.809279 |
|  | 12   | C | 12.308257 | 12.037088 | 7.069096 |
|  | 13   | C | 11.200521 | 12.610889 | 3.539969 |

Supplementary Material (ESI) for *PCCP*  
This journal is © the Owner Societies 2009

|    |   |           |           |          |
|----|---|-----------|-----------|----------|
| 14 | C | 11.200502 | 12.606374 | 7.799720 |
| 15 | C | 11.200371 | 12.607081 | 0.684139 |
| 16 | C | 11.200798 | 12.609597 | 4.944327 |
| 17 | C | 9.960302  | 12.798453 | 1.408207 |
| 18 | C | 9.960126  | 12.797042 | 5.668933 |
| 19 | C | 9.960045  | 12.803870 | 2.815892 |
| 20 | C | 9.959967  | 12.793823 | 7.075337 |
| 21 | C | 8.724775  | 12.581155 | 3.540197 |
| 22 | C | 8.724929  | 12.575892 | 7.799872 |
| 23 | C | 8.725691  | 12.576790 | 0.684013 |
| 24 | C | 8.724920  | 12.578954 | 4.944292 |
| 25 | C | 7.628517  | 11.988721 | 1.414961 |
| 26 | C | 7.628119  | 11.988242 | 5.674797 |
| 27 | C | 7.627762  | 11.990927 | 2.809777 |
| 28 | C | 7.626041  | 11.989666 | 7.069612 |
| 29 | C | 6.876882  | 10.988384 | 3.532940 |
| 30 | C | 6.873584  | 10.988279 | 7.793236 |
| 31 | C | 6.875950  | 10.987760 | 0.691248 |
| 32 | C | 6.874674  | 10.988041 | 4.950793 |
| 33 | C | 6.727048  | 9.748780  | 1.406626 |
| 34 | C | 6.723895  | 9.748940  | 5.666483 |
| 35 | C | 6.727686  | 9.749310  | 2.817379 |
| 36 | C | 6.723846  | 9.748962  | 7.077525 |
| 37 | C | 7.050424  | 8.571782  | 3.536383 |
| 38 | C | 7.048326  | 8.571106  | 7.796113 |
| 39 | C | 7.049783  | 8.571281  | 0.687513 |
| 40 | C | 7.049105  | 8.571599  | 4.947723 |
| 41 | C | 7.741853  | 7.573740  | 1.408660 |
| 42 | C | 7.741367  | 7.573899  | 5.668677 |
| 43 | C | 7.742047  | 7.573838  | 2.815176 |
| 44 | C | 7.740991  | 7.573713  | 7.075167 |
| 45 | C | 8.776088  | 6.903512  | 3.538406 |
| 46 | C | 8.775759  | 6.903921  | 7.798297 |
| 47 | C | 8.775976  | 6.903596  | 0.685314 |
| 48 | C | 8.775905  | 6.903876  | 4.945537 |
| 49 | C | 9.995531  | 6.655860  | 1.404457 |
| 50 | C | 9.995490  | 6.656587  | 5.664536 |
| 51 | C | 9.995569  | 6.655948  | 2.819290 |
| 52 | C | 9.995438  | 6.656512  | 7.079207 |
| 53 | C | 11.209969 | 6.928159  | 3.538229 |
| 54 | C | 11.209992 | 6.928184  | 7.798056 |
| 55 | C | 11.209858 | 6.928092  | 0.685540 |
| 56 | C | 11.210106 | 6.928260  | 4.945694 |
| 57 | C | 12.231405 | 7.616069  | 1.408813 |

|    |    |           |           |          |
|----|----|-----------|-----------|----------|
| 58 | C  | 12.232489 | 7.615410  | 5.668898 |
| 59 | C  | 12.231656 | 7.615956  | 2.814844 |
| 60 | C  | 12.232315 | 7.615446  | 7.075010 |
| 61 | C  | 12.910017 | 8.623256  | 3.536309 |
| 62 | C  | 12.909624 | 8.623684  | 7.796137 |
| 63 | C  | 12.909325 | 8.623673  | 0.687472 |
| 64 | C  | 12.910409 | 8.623267  | 4.947689 |
| 65 | Li | 9.945145  | 14.331466 | 4.241390 |
| 66 | Li | 15.301460 | 10.906416 | 8.504696 |
| 67 | Li | 4.686544  | 10.962913 | 8.512367 |
| 68 | Li | 4.687591  | 10.964788 | 4.231344 |
| 69 | Li | 15.296746 | 10.914234 | 4.238378 |
| 70 | Li | 10.018245 | 5.114521  | 4.242322 |
| 71 | Li | 10.019501 | 5.114363  | 8.501491 |
| 72 | Li | 9.948712  | 14.328240 | 8.502192 |
| 73 | H  | 9.969067  | 16.203523 | 3.590619 |
| 74 | H  | 10.015790 | 16.342543 | 4.345977 |

-----

|       | Total Energy  | Energy change | Max Gradient | Max Displacement |
|-------|---------------|---------------|--------------|------------------|
| opt== | -2479.0223664 | -0.0000133    | 0.000720     | 0.011232         |

## 9. H<sub>2</sub>/Li<sub>8</sub>/SWCN Atop site $F = -0.010$ au

Coordinates (Angstroms)

-----

|  | ATOM | X | Y         | Z         |          |
|--|------|---|-----------|-----------|----------|
|  | 1    | C | 14.118805 | 9.986003  | 1.372867 |
|  | 2    | C | 14.117537 | 9.984032  | 5.632364 |
|  | 3    | C | 14.117366 | 9.984028  | 2.845064 |
|  | 4    | C | 14.118949 | 9.986034  | 7.104614 |
|  | 5    | C | 13.390233 | 11.062349 | 3.539246 |
|  | 6    | C | 13.390788 | 11.063699 | 7.799284 |
|  | 7    | C | 13.390652 | 11.063627 | 0.678257 |
|  | 8    | C | 13.390545 | 11.062540 | 4.938262 |
|  | 9    | C | 12.344383 | 11.670891 | 1.404840 |
|  | 10   | C | 12.342464 | 11.666047 | 5.664686 |
|  | 11   | C | 12.342629 | 11.666773 | 2.812822 |
|  | 12   | C | 12.345253 | 11.672187 | 7.072669 |
|  | 13   | C | 11.163352 | 11.990549 | 3.526582 |
|  | 14   | C | 11.164511 | 11.991709 | 7.786344 |
|  | 15   | C | 11.164166 | 11.991882 | 0.690952 |
|  | 16   | C | 11.163272 | 11.990235 | 4.950908 |

Supplementary Material (ESI) for *PCCP*  
This journal is © the Owner Societies 2009

|    |   |           |           |          |
|----|---|-----------|-----------|----------|
| 17 | C | 9.933935  | 12.080631 | 1.395711 |
| 18 | C | 9.933285  | 12.081407 | 5.655765 |
| 19 | C | 9.933454  | 12.082201 | 2.821697 |
| 20 | C | 9.934295  | 12.079399 | 7.081623 |
| 21 | C | 8.705401  | 11.967348 | 3.526617 |
| 22 | C | 8.707044  | 11.961632 | 7.786639 |
| 23 | C | 8.706411  | 11.962956 | 0.690889 |
| 24 | C | 8.704945  | 11.967800 | 4.951003 |
| 25 | C | 7.533813  | 11.613633 | 1.404460 |
| 26 | C | 7.532020  | 11.618452 | 5.664374 |
| 27 | C | 7.533689  | 11.614955 | 2.812760 |
| 28 | C | 7.535780  | 11.609078 | 7.072595 |
| 29 | C | 6.510128  | 10.969758 | 3.539170 |
| 30 | C | 6.508317  | 10.970270 | 7.799015 |
| 31 | C | 6.509425  | 10.969578 | 0.678044 |
| 32 | C | 6.511419  | 10.968625 | 4.937856 |
| 33 | C | 5.834965  | 9.855892  | 1.372069 |
| 34 | C | 5.835045  | 9.856057  | 5.632049 |
| 35 | C | 5.835006  | 9.856269  | 2.845449 |
| 36 | C | 5.834529  | 9.855932  | 7.105495 |
| 37 | C | 6.481638  | 8.698701  | 3.527556 |
| 38 | C | 6.481366  | 8.698251  | 7.787545 |
| 39 | C | 6.481315  | 8.697944  | 0.690123 |
| 40 | C | 6.481482  | 8.698358  | 4.950108 |
| 41 | C | 7.562812  | 8.082029  | 1.406992 |
| 42 | C | 7.563196  | 8.082914  | 5.667030 |
| 43 | C | 7.563327  | 8.083265  | 2.810592 |
| 44 | C | 7.562926  | 8.082477  | 7.070624 |
| 45 | C | 8.777060  | 7.838910  | 3.530388 |
| 46 | C | 8.776643  | 7.838140  | 7.790370 |
| 47 | C | 8.776613  | 7.838011  | 0.687247 |
| 48 | C | 8.777011  | 7.838861  | 4.947217 |
| 49 | C | 10.024550 | 7.772284  | 1.404556 |
| 50 | C | 10.025004 | 7.772213  | 5.664380 |
| 51 | C | 10.025016 | 7.772142  | 2.813173 |
| 52 | C | 10.024532 | 7.772378  | 7.072993 |
| 53 | C | 11.271718 | 7.859681  | 3.530172 |
| 54 | C | 11.270633 | 7.862140  | 7.790272 |
| 55 | C | 11.270674 | 7.862034  | 0.687271 |
| 56 | C | 11.271723 | 7.859706  | 4.947355 |
| 57 | C | 12.479456 | 8.133362  | 1.406821 |
| 58 | C | 12.481405 | 8.127639  | 5.666930 |
| 59 | C | 12.481347 | 8.127741  | 2.810543 |
| 60 | C | 12.479304 | 8.133715  | 7.070646 |

|    |    |           |           |          |
|----|----|-----------|-----------|----------|
| 61 | C  | 13.533856 | 8.793454  | 3.527623 |
| 62 | C  | 13.533418 | 8.797217  | 7.787631 |
| 63 | C  | 13.533448 | 8.797094  | 0.689849 |
| 64 | C  | 13.533851 | 8.793496  | 4.949831 |
| 65 | Li | 9.923440  | 13.684350 | 4.238028 |
| 66 | Li | 15.428490 | 8.995162  | 8.498752 |
| 67 | Li | 4.585747  | 8.815726  | 8.498889 |
| 68 | Li | 4.585619  | 8.816530  | 4.238711 |
| 69 | Li | 15.427258 | 9.007548  | 4.238681 |
| 70 | Li | 10.041802 | 6.162528  | 4.238798 |
| 71 | Li | 10.043570 | 6.163101  | 8.498720 |
| 72 | Li | 9.914916  | 13.695547 | 8.497157 |
| 73 | H  | 9.978004  | 15.603086 | 3.733930 |
| 74 | H  | 9.981385  | 15.640135 | 4.501731 |

-----

|       | Total Energy  | Energy change | Max Gradient | Max Displacement |
|-------|---------------|---------------|--------------|------------------|
| opt== | -2479.1004840 | -0.0000079    | 0.001591     | 0.025697         |

## 10. H<sub>2</sub>/Li/SWCN Bridge site $F = 0.000$ au

Coordinates (Angstroms)

-----

|  | ATOM | X | Y         | Z         |          |
|--|------|---|-----------|-----------|----------|
|  | 1    | C | 13.063730 | 9.939503  | 1.407012 |
|  | 2    | C | 13.067308 | 9.938303  | 5.667090 |
|  | 3    | C | 13.067199 | 9.938072  | 2.821026 |
|  | 4    | C | 13.063878 | 9.939716  | 7.081092 |
|  | 5    | C | 12.827720 | 11.145299 | 3.536922 |
|  | 6    | C | 12.823507 | 11.145927 | 7.797862 |
|  | 7    | C | 12.823331 | 11.145762 | 0.690147 |
|  | 8    | C | 12.827993 | 11.145470 | 4.951234 |
|  | 9    | C | 12.169328 | 12.190089 | 1.408477 |
|  | 10   | C | 12.179976 | 12.190136 | 5.674315 |
|  | 11   | C | 12.179181 | 12.189345 | 2.813757 |
|  | 12   | C | 12.170039 | 12.190905 | 7.079585 |
|  | 13   | C | 11.170634 | 12.899673 | 3.541502 |
|  | 14   | C | 11.164463 | 12.912343 | 7.802843 |
|  | 15   | C | 11.164194 | 12.911748 | 0.685165 |
|  | 16   | C | 11.171187 | 12.900140 | 4.946248 |
|  | 17   | C | 9.950182  | 13.160412 | 1.405177 |
|  | 18   | C | 9.949846  | 13.158599 | 5.678059 |
|  | 19   | C | 9.949548  | 13.158739 | 2.809967 |

Supplementary Material (ESI) for *PCCP*  
This journal is © the Owner Societies 2009

|    |   |           |           |          |
|----|---|-----------|-----------|----------|
| 20 | C | 9.950320  | 13.160929 | 7.082800 |
| 21 | C | 8.735405  | 12.870517 | 3.542080 |
| 22 | C | 8.742729  | 12.881422 | 7.802612 |
| 23 | C | 8.742774  | 12.881199 | 0.685350 |
| 24 | C | 8.735581  | 12.870213 | 4.946088 |
| 25 | C | 7.753624  | 12.138971 | 1.408105 |
| 26 | C | 7.745414  | 12.136921 | 5.673529 |
| 27 | C | 7.745276  | 12.136870 | 2.814670 |
| 28 | C | 7.753634  | 12.139207 | 7.080003 |
| 29 | C | 7.111996  | 11.084134 | 3.536575 |
| 30 | C | 7.114643  | 11.085202 | 7.797575 |
| 31 | C | 7.114832  | 11.085077 | 0.690612 |
| 32 | C | 7.112577  | 11.083932 | 4.951531 |
| 33 | C | 6.893505  | 9.874562  | 1.407035 |
| 34 | C | 6.892701  | 9.873324  | 5.667055 |
| 35 | C | 6.892053  | 9.873224  | 2.821086 |
| 36 | C | 6.894128  | 9.874774  | 7.081170 |
| 37 | C | 7.124292  | 8.664302  | 3.537884 |
| 38 | C | 7.123164  | 8.664558  | 7.797868 |
| 39 | C | 7.123233  | 8.664388  | 0.690341 |
| 40 | C | 7.124553  | 8.664379  | 4.950296 |
| 41 | C | 7.788396  | 7.627838  | 1.408260 |
| 42 | C | 7.790173  | 7.629208  | 5.668071 |
| 43 | C | 7.790008  | 7.629016  | 2.819979 |
| 44 | C | 7.789611  | 7.629223  | 7.079883 |
| 45 | C | 8.803175  | 6.928837  | 3.538939 |
| 46 | C | 8.802441  | 6.928275  | 7.798908 |
| 47 | C | 8.802109  | 6.927524  | 0.689208 |
| 48 | C | 8.803529  | 6.929867  | 4.949183 |
| 49 | C | 10.012052 | 6.687144  | 1.409286 |
| 50 | C | 10.012429 | 6.689337  | 5.669289 |
| 51 | C | 10.012404 | 6.688344  | 2.818781 |
| 52 | C | 10.012247 | 6.688845  | 7.078798 |
| 53 | C | 11.216725 | 6.953805  | 3.538648 |
| 54 | C | 11.216234 | 6.954124  | 7.798641 |
| 55 | C | 11.216094 | 6.954013  | 0.689456 |
| 56 | C | 11.216424 | 6.954641  | 4.949393 |
| 57 | C | 12.214163 | 7.675773  | 1.408009 |
| 58 | C | 12.214238 | 7.676075  | 5.667818 |
| 59 | C | 12.214619 | 7.675386  | 2.820281 |
| 60 | C | 12.214247 | 7.676106  | 7.080106 |
| 61 | C | 12.859498 | 8.724589  | 3.537623 |
| 62 | C | 12.856940 | 8.725928  | 7.797702 |
| 63 | C | 12.856736 | 8.725877  | 0.690402 |

|    |    |           |           |          |
|----|----|-----------|-----------|----------|
| 64 | C  | 12.859276 | 8.724795  | 4.950451 |
| 65 | Li | 9.970879  | 14.752079 | 4.243224 |
| 66 | H  | 11.670803 | 15.654094 | 4.264846 |
| 67 | H  | 11.230256 | 16.289602 | 4.237973 |

-----

|       |               |               |              |                  |
|-------|---------------|---------------|--------------|------------------|
|       | Total Energy  | Energy change | Max Gradient | Max Displacement |
| opt== | -2426.8416293 | -0.0000180    | 0.001149     | 0.016111         |

### 11. H<sub>2</sub>/Li/SWCN Bridge site $F = +0.010$ au

Coordinates (Angstroms)

-----

|  | ATOM | X | Y         | Z         |          |
|--|------|---|-----------|-----------|----------|
|  | 1    | C | 13.221606 | 9.950912  | 1.404711 |
|  | 2    | C | 13.214840 | 9.948024  | 5.664723 |
|  | 3    | C | 13.219844 | 9.948944  | 2.822767 |
|  | 4    | C | 13.212908 | 9.949976  | 7.082173 |
|  | 5    | C | 12.984183 | 11.156524 | 3.533917 |
|  | 6    | C | 12.970452 | 11.156358 | 7.794685 |
|  | 7    | C | 12.972459 | 11.156500 | 0.692457 |
|  | 8    | C | 12.976353 | 11.154054 | 4.952749 |
|  | 9    | C | 12.234140 | 12.160909 | 1.411586 |
|  | 10   | C | 12.245011 | 12.163680 | 5.675896 |
|  | 11   | C | 12.243679 | 12.159991 | 2.811493 |
|  | 12   | C | 12.234148 | 12.162894 | 7.075942 |
|  | 13   | C | 11.163771 | 12.773967 | 3.541940 |
|  | 14   | C | 11.160280 | 12.796689 | 7.803598 |
|  | 15   | C | 11.159431 | 12.791990 | 0.683690 |
|  | 16   | C | 11.163832 | 12.775786 | 4.945806 |
|  | 17   | C | 9.935308  | 12.994007 | 1.403628 |
|  | 18   | C | 9.934198  | 12.989255 | 5.678472 |
|  | 19   | C | 9.934479  | 12.987700 | 2.809457 |
|  | 20   | C | 9.934662  | 12.997403 | 7.084339 |
|  | 21   | C | 8.708131  | 12.749090 | 3.542434 |
|  | 22   | C | 8.715867  | 12.763517 | 7.803830 |
|  | 23   | C | 8.717151  | 12.759909 | 0.683766 |
|  | 24   | C | 8.707978  | 12.750167 | 4.945538 |
|  | 25   | C | 7.656144  | 12.106425 | 1.411882 |
|  | 26   | C | 7.644946  | 12.109162 | 5.675949 |
|  | 27   | C | 7.645966  | 12.106523 | 2.811671 |
|  | 28   | C | 7.654908  | 12.109193 | 7.076192 |
|  | 29   | C | 6.937978  | 11.079910 | 3.534431 |

Supplementary Material (ESI) for *PCCP*  
 This journal is © the Owner Societies 2009

|    |    |           |           |          |
|----|----|-----------|-----------|----------|
| 30 | C  | 6.942789  | 11.084489 | 7.794752 |
| 31 | C  | 6.943051  | 11.083199 | 0.692965 |
| 32 | C  | 6.943170  | 11.079076 | 4.953036 |
| 33 | C  | 6.736588  | 9.869779  | 1.405208 |
| 34 | C  | 6.737067  | 9.867775  | 5.665253 |
| 35 | C  | 6.730167  | 9.867192  | 2.823218 |
| 36 | C  | 6.737192  | 9.870700  | 7.082706 |
| 37 | C  | 7.007811  | 8.674376  | 3.541731 |
| 38 | C  | 7.020374  | 8.680581  | 7.801963 |
| 39 | C  | 7.017492  | 8.679538  | 0.685880 |
| 40 | C  | 7.012634  | 8.675747  | 4.946165 |
| 41 | C  | 7.755450  | 7.700949  | 1.407117 |
| 42 | C  | 7.755842  | 7.699333  | 5.666977 |
| 43 | C  | 7.754802  | 7.700964  | 2.821167 |
| 44 | C  | 7.757060  | 7.700130  | 7.080962 |
| 45 | C  | 8.810154  | 7.079560  | 3.535664 |
| 46 | C  | 8.810182  | 7.074624  | 7.795582 |
| 47 | C  | 8.808660  | 7.075121  | 0.692515 |
| 48 | C  | 8.813058  | 7.082838  | 4.952139 |
| 49 | C  | 10.020945 | 6.868885  | 1.408913 |
| 50 | C  | 10.022319 | 6.858341  | 5.668456 |
| 51 | C  | 10.021684 | 6.867417  | 2.819819 |
| 52 | C  | 10.021686 | 6.856753  | 7.079866 |
| 53 | C  | 11.231437 | 7.095846  | 3.535426 |
| 54 | C  | 11.227745 | 7.102459  | 7.795610 |
| 55 | C  | 11.226790 | 7.106062  | 0.691902 |
| 56 | C  | 11.230044 | 7.097819  | 4.952334 |
| 57 | C  | 12.265928 | 7.753643  | 1.407156 |
| 58 | C  | 12.269289 | 7.746750  | 5.666457 |
| 59 | C  | 12.267526 | 7.750883  | 2.821457 |
| 60 | C  | 12.267118 | 7.750342  | 7.080785 |
| 61 | C  | 12.984198 | 8.747173  | 3.541532 |
| 62 | C  | 12.980713 | 8.748868  | 7.801290 |
| 63 | C  | 12.978718 | 8.751423  | 0.685979 |
| 64 | C  | 12.978891 | 8.747894  | 4.945792 |
| 65 | Li | 9.932417  | 14.592433 | 4.244522 |
| 66 | H  | 11.729349 | 15.304349 | 4.262290 |
| 67 | H  | 11.400392 | 16.005857 | 4.250593 |

-----  
 Total Energy    Energy change    Max Gradient    Max Displacement  
 opt== -2427.2911807    0.0000116    0.002064    0.012639

**12. H<sub>2</sub>/SWCN Atop site  $F = 0.000$  au**

Coordinates (Angstroms)

| ----- |      |           |           |          |
|-------|------|-----------|-----------|----------|
|       | ATOM | X         | Y         | Z        |
| 1     | C    | 13.142605 | 9.829254  | 1.400004 |
| 2     | C    | 13.144166 | 9.828714  | 5.660029 |
| 3     | C    | 13.141289 | 9.828564  | 2.813682 |
| 4     | C    | 13.143824 | 9.829140  | 7.073785 |
| 5     | C    | 12.893472 | 11.034394 | 3.530054 |
| 6     | C    | 12.896458 | 11.036193 | 7.789994 |
| 7     | C    | 12.896650 | 11.036547 | 0.683808 |
| 8     | C    | 12.895050 | 11.034920 | 4.943749 |
| 9     | C    | 12.208144 | 12.057711 | 1.400052 |
| 10    | C    | 12.206011 | 12.054905 | 5.660001 |
| 11    | C    | 12.205846 | 12.055091 | 2.813779 |
| 12    | C    | 12.207285 | 12.056476 | 7.073667 |
| 13    | C    | 11.180523 | 12.735992 | 3.530426 |
| 14    | C    | 11.181859 | 12.738560 | 7.790084 |
| 15    | C    | 11.182441 | 12.740063 | 0.683760 |
| 16    | C    | 11.180711 | 12.736226 | 4.943302 |
| 17    | C    | 9.972272  | 12.974300 | 1.400040 |
| 18    | C    | 9.971874  | 12.975228 | 5.659696 |
| 19    | C    | 9.971869  | 12.974576 | 2.814020 |
| 20    | C    | 9.972297  | 12.973825 | 7.073708 |
| 21    | C    | 8.765181  | 12.723771 | 3.530450 |
| 22    | C    | 8.765942  | 12.723867 | 7.790067 |
| 23    | C    | 8.765469  | 12.725032 | 0.683747 |
| 24    | C    | 8.765343  | 12.723149 | 4.943310 |
| 25    | C    | 7.748121  | 12.030749 | 1.400060 |
| 26    | C    | 7.747660  | 12.030364 | 5.659932 |
| 27    | C    | 7.748359  | 12.030006 | 2.813844 |
| 28    | C    | 7.748909  | 12.029692 | 7.073653 |
| 29    | C    | 7.071621  | 11.001569 | 3.530017 |
| 30    | C    | 7.072380  | 11.001490 | 7.790014 |
| 31    | C    | 7.071947  | 11.001875 | 0.683835 |
| 32    | C    | 7.069984  | 11.002125 | 4.943848 |
| 33    | C    | 6.837209  | 9.792770  | 1.400029 |
| 34    | C    | 6.835845  | 9.792710  | 5.660021 |
| 35    | C    | 6.838224  | 9.792597  | 2.813713 |
| 36    | C    | 6.836924  | 9.792673  | 7.073786 |
| 37    | C    | 7.081667  | 8.585344  | 3.530152 |
| 38    | C    | 7.080831  | 8.585243  | 7.790140 |
| 39    | C    | 7.080754  | 8.585236  | 0.683716 |

|    |   |           |           |          |
|----|---|-----------|-----------|----------|
| 40 | C | 7.080329  | 8.585146  | 4.943720 |
| 41 | C | 7.769725  | 7.564366  | 1.400120 |
| 42 | C | 7.769758  | 7.564619  | 5.660129 |
| 43 | C | 7.769775  | 7.564038  | 2.813704 |
| 44 | C | 7.770070  | 7.564800  | 7.073696 |
| 45 | C | 8.797488  | 6.885300  | 3.530054 |
| 46 | C | 8.797746  | 6.886451  | 7.790074 |
| 47 | C | 8.797651  | 6.886230  | 0.683763 |
| 48 | C | 8.797647  | 6.886244  | 4.943752 |
| 49 | C | 10.007165 | 6.653198  | 1.400046 |
| 50 | C | 10.007267 | 6.653551  | 5.660002 |
| 51 | C | 10.007240 | 6.652563  | 2.813858 |
| 52 | C | 10.007208 | 6.653849  | 7.073806 |
| 53 | C | 11.214225 | 6.899419  | 3.530065 |
| 54 | C | 11.213816 | 6.900959  | 7.790091 |
| 55 | C | 11.213820 | 6.900805  | 0.683749 |
| 56 | C | 11.214070 | 6.900304  | 4.943738 |
| 57 | C | 12.233478 | 7.590961  | 1.400095 |
| 58 | C | 12.234114 | 7.590497  | 5.660100 |
| 59 | C | 12.233782 | 7.590249  | 2.813730 |
| 60 | C | 12.233342 | 7.591298  | 7.073703 |
| 61 | C | 12.911077 | 8.618664  | 3.530072 |
| 62 | C | 12.910794 | 8.619628  | 7.790101 |
| 63 | C | 12.910646 | 8.619655  | 0.683686 |
| 64 | C | 12.911889 | 8.618663  | 4.943811 |
| 65 | H | 9.943595  | 15.472139 | 3.842402 |
| 66 | H | 9.942556  | 15.482450 | 4.611337 |

-----  
 Total Energy    Energy change    Max Gradient    Max Displacement  
 opt== -2419.4196707    -0.0000118    0.000367    0.010782

### 13. H<sub>2</sub>/SWCN Atop site $F = +0.010$ au

Coordinates (Angstroms)

| ----- |      |   |           |           |          |
|-------|------|---|-----------|-----------|----------|
|       | ATOM | X | Y         | Z         |          |
|       | 1    | C | 13.282425 | 9.822135  | 1.397716 |
|       | 2    | C | 13.287049 | 9.822182  | 5.657551 |
|       | 3    | C | 13.284340 | 9.822080  | 2.815901 |
|       | 4    | C | 13.283461 | 9.822355  | 7.075805 |
|       | 5    | C | 13.049799 | 11.030740 | 3.528107 |
|       | 6    | C | 13.048518 | 11.030778 | 7.788133 |

Supplementary Material (ESI) for *PCCP*  
This journal is © the Owner Societies 2009

|    |   |           |           |          |
|----|---|-----------|-----------|----------|
| 7  | C | 13.048598 | 11.030888 | 0.685344 |
| 8  | C | 13.051555 | 11.031242 | 4.945408 |
| 9  | C | 12.286730 | 12.019426 | 1.405140 |
| 10 | C | 12.287151 | 12.018202 | 5.664973 |
| 11 | C | 12.287174 | 12.019140 | 2.808486 |
| 12 | C | 12.287678 | 12.020379 | 7.068270 |
| 13 | C | 11.187104 | 12.593838 | 3.529562 |
| 14 | C | 11.187384 | 12.596229 | 7.789175 |
| 15 | C | 11.187692 | 12.597606 | 0.684103 |
| 16 | C | 11.187139 | 12.593138 | 4.943778 |
| 17 | C | 9.969028  | 12.777156 | 1.393015 |
| 18 | C | 9.968912  | 12.772018 | 5.652767 |
| 19 | C | 9.969019  | 12.776269 | 2.820583 |
| 20 | C | 9.968909  | 12.776948 | 7.080239 |
| 21 | C | 8.751591  | 12.589898 | 3.529581 |
| 22 | C | 8.750463  | 12.594831 | 7.789145 |
| 23 | C | 8.750425  | 12.595591 | 0.684066 |
| 24 | C | 8.751437  | 12.588772 | 4.943626 |
| 25 | C | 7.655635  | 12.008188 | 1.405201 |
| 26 | C | 7.654146  | 12.007607 | 5.665004 |
| 27 | C | 7.654718  | 12.008383 | 2.808298 |
| 28 | C | 7.654259  | 12.009276 | 7.068034 |
| 29 | C | 6.907795  | 11.006916 | 3.528145 |
| 30 | C | 6.910596  | 11.006208 | 7.788180 |
| 31 | C | 6.911087  | 11.006163 | 0.685245 |
| 32 | C | 6.904079  | 11.008106 | 4.945424 |
| 33 | C | 6.701745  | 9.793340  | 1.397721 |
| 34 | C | 6.696438  | 9.793626  | 5.657412 |
| 35 | C | 6.699757  | 9.793505  | 2.815974 |
| 36 | C | 6.698806  | 9.793623  | 7.075780 |
| 37 | C | 6.985762  | 8.604428  | 3.534348 |
| 38 | C | 6.986418  | 8.604511  | 7.794269 |
| 39 | C | 6.986582  | 8.604126  | 0.679288 |
| 40 | C | 6.984162  | 8.604312  | 4.939435 |
| 41 | C | 7.736893  | 7.633071  | 1.399747 |
| 42 | C | 7.737091  | 7.635176  | 5.659845 |
| 43 | C | 7.736710  | 7.633513  | 2.813938 |
| 44 | C | 7.736746  | 7.633903  | 7.073901 |
| 45 | C | 8.797528  | 7.021324  | 3.528306 |
| 46 | C | 8.797334  | 7.020488  | 7.788295 |
| 47 | C | 8.797004  | 7.018893  | 0.685449 |
| 48 | C | 8.797722  | 7.022836  | 4.945371 |
| 49 | C | 10.008677 | 6.802865  | 1.401005 |
| 50 | C | 10.008680 | 6.807580  | 5.661105 |

Supplementary Material (ESI) for *PCCP*  
This journal is © the Owner Societies 2009

|    |   |           |           |          |
|----|---|-----------|-----------|----------|
| 51 | C | 10.008755 | 6.804456  | 2.812657 |
| 52 | C | 10.008675 | 6.806045  | 7.072647 |
| 53 | C | 11.218607 | 7.029127  | 3.528378 |
| 54 | C | 11.218799 | 7.028088  | 7.788352 |
| 55 | C | 11.219016 | 7.026713  | 0.685410 |
| 56 | C | 11.218441 | 7.030286  | 4.945304 |
| 57 | C | 12.273900 | 7.649900  | 1.399764 |
| 58 | C | 12.273861 | 7.651618  | 5.659749 |
| 59 | C | 12.274458 | 7.650088  | 2.814010 |
| 60 | C | 12.274306 | 7.650225  | 7.073965 |
| 61 | C | 13.016291 | 8.628187  | 3.534274 |
| 62 | C | 13.014561 | 8.628737  | 7.794339 |
| 63 | C | 13.014064 | 8.628689  | 0.679291 |
| 64 | C | 13.017096 | 8.628246  | 4.939353 |
| 65 | H | 9.959175  | 15.400094 | 3.847042 |
| 66 | H | 9.957332  | 15.412679 | 4.615653 |

-----  
Total Energy    Energy change    Max Gradient    Max Displacement  
opt== -2419.8724683    -0.0000029    0.000657    0.013998
